# Supplementary material
Source: publisher site journal article supplement (https://static.cambridge.org/content/id/urn:cambridge.org:id:article:S2052263020000330/resource/name/S2052263020000330supp001.docx)
Supplement: Supplementary file 1 [file S2052263020000330supp001.docx]

Supplemental Appendix for Race, Dehumanization, and the NFL Anthem Protests

Stephen M. Utych

Appendix A. Question Text

**Attitudes towards Protest**

Protest Support - I support NFL players protesting police brutality by kneeling or raising a fist during the national anthem.

Punish Protest - The NFL should punish players who refuse to stand for the national anthem.

Disrespect Military - NFL players who protest the national anthem are disrespecting the American military.

| Strongly Disagree |  |  |  |  |  | Strongly Agree |
| --- | --- | --- | --- | --- | --- | --- |
| **1** | **2** | **3** | **4** | **5** | **6** | **7** |

Appendix B. Supplemental Analyses

**Table B1.** *Dehumanization and Attitudes towards Anthem Protests – Study 1*

|  | Protest Support | Punish Protest | Disrespect Military |
| --- | --- | --- | --- |
| **Dehumanization** | **0.091 (0.146)** | **0.147 (0.154)** | **0.105 (0.158)** |
| **Dak Prescott** | **0.241** (0.145)** | **-0.150 (0.153)** | **-0.136 (0.157)** |
| **Dehumanization x Dak Prescott** | **-0.350** (0.204)** | **0.190 (0.214)** | **0.208 (0.220)** |
| Republican | -0.320*** (0.029) | 0.337*** (0.030) | 0.387*** (0.031) |
| Female | -0.407*** (0.106) | 0.465*** (0.111) | 0.551*** (0.114) |
| Age | -0.026*** (0.004) | 0.011*** (0.005) | 0.009** (0.005) |
| Education | 0.015 (0.040) | -0.010 (0.042) | -0.006 (0.044) |
| FT Rating - Kaepernick | 0.039*** (0.002) | -0.032*** (0.002) | -0.035*** (0.002) |
| Cowboys Fan | -0.598*** (0.204) | 0.622*** (0.214) | 0.561*** (0.220) |
| Raiders Fan | 0.506 (0.537) | -0.328 (0.564) | -0.490 (0.580) |
| Constant | 4.246*** (0.319) | 3.333*** (0.335) | 3.621*** (0.344) |
| *N* | 874 | 874 | 874 |
| *R*2 | 0.6033 | 0.5216 | 0.5529 |

Table entries are OLS coefficients with standard errors in parenthesis.

* p<0.1, ** p<0.05, *** p<0.01, one-tailed

**Table B2.** *Dehumanization and Attitudes towards Anthem Protests – Study 2*

|  | Protest Support | Punish Protest | Disrespect Military |
| --- | --- | --- | --- |
| **Dehumanization** | **-0.168 (0.171)** | **-0.127 (0.178)** | **-0.096 (0.184)** |
| **Black Player** | **-0.107 (0.171)** | **-0.241 (0.178)** | **-0.129 (0.184)** |
| **Dehumanization x Black Player** | **-0.172 (0.241)** | **0.608** (0.251)** | **0.444* (0.259)** |
| Republican | -0.739*** (0.028) | 0.584*** (0.029) | 0.713*** (0.030) |
| Female | -0.057 (0.122) | 0.183 (0.127) | 0.277** (0.131) |
| Age | -0.024*** (0.005) | 0.014*** (0.005) | 0.015*** (0.005) |
| Education | 0.100** (0.049) | -0.123** (0.052) | -0.079 (0.053) |
| Constant | 6.958*** (0.353) | 1.644*** (0.369) | 1.347*** (0.380) |
| *N* | 758 | 758 | 758 |
| *R*2 | 0.5135 | 0.3764 | 0.4486 |

Table entries are OLS coefficients with standard errors in parenthesis.

* p<0.1, ** p<0.05, *** p<0.01, one-tailed

**Table B3.** *Dehumanization and Attitudes towards Anthem Protests – Study 1 (Party Interaction)*

|  | Protest Support | Punish Protest | Disrespect Military |
| --- | --- | --- | --- |
| **Dehumanization** | -0.047 (0.231) | 0.174 (0.243) | 0.242 (0.251) |
| **Dak Prescott** | 0.392* (0.229) | -0.455* (0.241) | -0.138 (0.248) |
| Republican | -0.290*** (0.051) | 0.292*** (0.054) | 0.401*** (0.055) |
| **Dehumanization x Dak Prescott** | -0.090 (0.324) | 0.288 (0.341) | 0.089 (0.351) |
| Dehumanization x Republican | 0.052 (0.069) | -0.010 (0.072) | -0.052 (0.074) |
| Dak Prescott x Republican | -0.058 (0.068) | 0.117 (0.071) | 0.001 (0.074) |
| Dehumanization x Dak Prescott x Republican | -0.093 (0.094) | -0.040 (0.099) | 0.045 (0.102) |
| Female | -0.409*** (0.106) | 0.473*** (0.111) | 0.552*** (0.114) |
| Age | -0.025*** (0.004) | 0.011** (0.005) | 0.009** (0.005) |
| Education | 0.016 (0.040) | -0.011 (0.042) | -0.006 (0.044) |
| FT Rating - Kaepernick | 0.039*** (0.002) | -0.032*** (0.002) | -0.035*** (0.002) |
| Cowboys Fan | -0.596*** (0.204) | 0.611*** (0.215) | 0.571** (0.221) |
| Raiders Fan | 0.415 (0.537) | -0.276 (0.565) | -0.459 (0.582) |
| Constant | 4.163*** (0.341) | 3.447*** (0.359) | 3.576*** (0.369) |
| *N* | 874 | 874 | 874 |
| *R*2 | 0.6061 | 0.5240 | 0.5532 |

Table entries are OLS coefficients with standard errors in parenthesis.

* p<0.1, ** p<0.05, *** p<0.01, one-tailed

**Table B4.** *Dehumanization and Attitudes towards Anthem Protests – Study 2 (Party Interaction)*

|  | Protest Support | Punish Protest | Disrespect Military |
| --- | --- | --- | --- |
| **Dehumanization** | -0.103 (0.260) | 0.466** (0.270) | 0.166 (0.279) |
| **Black Player** | -0.055 (0.252) | 0.040 (0.262) | -0.009 (0.271) |
| Republican | -0.733*** (0.055) | 0.703*** (0.058) | 0.789*** (0.060) |
| **Dehumanization x Black Player** | -0.331 (0.354) | 0.077 (0.368) | 0.438 (0.381) |
| Dehumanization x Republican | -0.027 (0.078) | -0.238*** (0.082) | -0.103 (0.084) |
| Black Player x Republican | -0.023 (0.080) | -0.106 (0.083) | -0.039 (0.086) |
| Dehumanization x Black Player x Republican | 0.070 (0.111) | 0.210** (0.116) | -0.013 (0.120) |
| Female | -0.056 (0.122) | 0.172* (0.127) | 0.268** (0.131) |
| Age | -0.024*** (0.005) | 0.013*** (0.005) | 0.014*** (0.005) |
| Education | 0.100** (0.050) | -0.119** (0.052) | -0.073* (0.053) |
| Constant | 6.948*** (0.376) | 1.342*** (0.390) | 1.136*** (0.404) |
| *N* | 758 | 758 | 758 |
| *R*2 | 0.5138 | 0.3835 | 0.4516 |

Table entries are OLS coefficients with standard errors in parenthesis.

* p<0.1, ** p<0.05, *** p<0.01, one-tailed

**Table B5.** *Dehumanization and Attitudes towards Anthem Protests - Dak Prescott (Black respondents)*

|  | Protest Support | Punish Protest | Disrespect Military |
| --- | --- | --- | --- |
| **Dehumanization** | **-0.111 (0.346)** | **0.042 (0.482)** | **-0.047 (0.433)** |
| Republican | -0.062 (0.101) | 0.204 (0.140) | 0.166 (0.126) |
| Female | 0.132 (0.372) | -0.284 (0.518) | -0.442 (0.466) |
| Age | -0.006 (0.018) | -0.001 (0.025) | -0.008 (0.022) |
| Education | 0.132 (0.166) | -0.027 (0.231) | -0.057 (0.208) |
| FT Rating - Kaepernick | 0.041*** (0.006) | -0.033*** (0.009) | -0.038*** (0.008) |
| Cowboys Fan | -0.080 (0.606) | -0.787 (0.845) | -0.622 (0.758) |
| Constant | 2.544** (1.146) | 4.657*** (1.597) | 5.813*** (1.434) |
| *N* | 56 | 56 | 56 |
| *R*2 | 0.5577 | 0.3400 | 0.4519 |

Table entries are OLS coefficients with standard errors in parenthesis.

* p<0.1, ** p<0.05, *** p<0.01

**Table B6.** *Dehumanization and Attitudes towards Anthem Protests – Derek Carr (Black respondents)*

|  | Protest Support | Punish Protest | Disrespect Military |
| --- | --- | --- | --- |
| **Dehumanization** | **-0.148 (0.332)** | **0.385 (0.567)** | **0.256 (0.540)** |
| Republican | -0.248** (0.096) | 0.230 (0.164) | 0.297* (0.156) |
| Female | -0.651* (0.325) | 0.105 (0.555) | 0.391 (0.528) |
| Age | -0.046* (0.023) | -0.023 (0.039) | -0.012 (0.037) |
| Education | -0.067 (0.130) | 0.536** (0.223) | 0.406* (0.212) |
| FT Rating - Kaepernick | 0.037*** (0.006) | -0.025** (0.011) | -0.039*** (0.010) |
| Cowboys Fan | 1.264 (1.273) | 0.379 (2.173) | -0.266 (2.068) |
| Constant | 5.629*** (1.022) | 1.529 (1.746) | 3.019* (1.661) |
| *N* | 42 | 42 | 42 |
| *R*2 | 0.6815 | 0.3570 | 0.5068 |

Table entries are OLS coefficients with standard errors in parenthesis.

* p<0.1, ** p<0.05, *** p<0.01

**Table B7.** *Dehumanization and Attitudes towards Anthem Protests – Study 1 (excludes potential bots)*

|  | Protest Support | Punish Protest | Disrespect Military |
| --- | --- | --- | --- |
| **Dehumanization** | 0.023 (0.150) | 0.153 (0.157) | 0.112 (0.162) |
| **Dak Prescott** | 0.246** (0.148) | -0.086 (0.155) | -0.095 (0.161) |
| **Dehumanization x Dak Prescott** | -0.305* (0.209) | 0.177 (0.218) | 0.215 (0.226) |
| Republican | -0.359*** (0.030) | 0.331*** (0.031) | 0.372*** (0.033) |
| Female | -0.438*** (0.108) | 0.497*** (0.113) | 0.602*** (0.117) |
| Age | -0.024*** (0.004) | 0.015*** (0.005) | 0.012*** (0.005) |
| Education | 0.032 (0.041) | -0.012 (0.043) | -0.015 (0.045) |
| FT Rating - Kaepernick | 0.037*** (0.002) | -0.033*** (0.002) | -0.036*** (0.002) |
| Cowboys Fan | -0.548*** (0.217) | 0.510** (0.226) | 0.576*** (0.235) |
| Raiders Fan | 0.596 (0.532) | -0.259 (0.556) | -0.422 (0.576) |
| Constant | 4.258*** (0.326) | 3.141*** (0.341) | 3.551*** (0.353) |
| *N* | 819 | 819 | 819 |
| *R*2 | 0.6182 | 0.5346 | 0.5640 |

Table entries are OLS coefficients with standard errors in parenthesis.

* p<0.1, ** p<0.05, *** p<0.01, one-tailed

**Table B8.** *Dehumanization and Attitudes towards Anthem Protests – Study 2(excludes potential bots)*

|  | Protest Support | Punish Protest | Disrespect Military |
| --- | --- | --- | --- |
| **Dehumanization** | -0.146 (0.174) | -0.175 (0.180) | -0.130 (0.185) |
| **Black Player** | -0.083 (0.173) | -0.247 (0.179) | -0.137 (0.184) |
| **Dehumanization x Black Player** | -0.216 (0.245) | 0.587** (0.254) | 0.397* (0.261) |
| Republican | -0.751*** (0.029) | 0.589*** (0.030) | 0.725*** (0.030) |
| Female | -0.032 (0.124) | 0.197 (0.128) | 0.270** (0.132) |
| Age | -0.025*** (0.005) | 0.015*** (0.005) | 0.017*** (0.005) |
| Education | 0.100** (0.050) | -0.145*** (0.052) | -0.092* (0.053) |
| Constant | 6.980*** (0.356) | 1.687*** (0.369) | 1.297*** (0.379) |
| *N* | 730 | 730 | 730 |
| *R*2 | 0.5224 | 0.3878 | 0.4651 |

Table entries are OLS coefficients with standard errors in parenthesis.

* p<0.1, ** p<0.05, *** p<0.01, one-tailed

**Table B9.** *Dehumanization and Attitudes towards Anthem Protests – Study 1 – FT Kaepernick Interactions*

|  | Protest Support | Punish Protest | Disrespect Military |
| --- | --- | --- | --- |
| Dehumanization | 0.095 (0.266) | 0.042 (0.280) | 0.167 (0.287) |
| Dak Prescott | 0.236 (0.263) | -0.103 (0.277) | -0.166 (0.284) |
| FT Rating - Kaepernick | 0.039*** (0.003) | -0.033*** (0.004) | -0.035*** (0.004) |
| Dehumanization x Dak Prescott | -0.248 (0.364) | 0.241 (0.383) | 0.122 (0.393) |
| Dehumanization x FT Rating - Kaepernick | -0.000 (0.004) | 0.002 (0.005) | -0.001 (0.005) |
| Dak Prescott x FT Rating - Kaepernick | 0.000 (0.005) | -0.001 (0.005) | 0.001 (0.005) |
| Dehumanization x Dak Prescott x FT Rating - Kaepernick | -0.002 (0.006) | -0.001 (0.007) | 0.002 (0.007) |
| Female | -0.409*** (0.106) | 0.468*** (0.111) | 0.550*** (0.114) |
| Age | -0.026*** (0.004) | 0.011*** (0.005) | 0.009** (0.005) |
| Education | 0.015 (0.040) | -0.010 (0.043) | -0.006 (0.044) |
| Republican | -0.320*** (0.029) | 0.336*** (0.030) | 0.387*** (0.031) |
| Cowboys Fan | -0.602*** (0.205) | 0.629*** (0.216) | 0.559*** (0.222) |
| Raiders Fan | 0.518 (0.538) | -0.323 (0.566) | -0.499 (0.581) |
| Constant | 4.225*** (0.346) | 3.353*** (0.363) | 3.622*** (0.373) |
| *N* | 874 | 874 | 874 |
| *R*2 | 0.6035 | 0.5219 | 0.5530 |

Table entries are OLS coefficients with standard errors in parenthesis.

* p<0.1, ** p<0.05, *** p<0.01, one-tailed

**Table B10.** *Dehumanization and Attitudes towards Anthem Protests – Study 1 - Race Interaction*

|  | Protest Support | Punish Protest | Disrespect Military |
| --- | --- | --- | --- |
| Dehumanization | 0.427** (0.258) | -0.321 (0.280) | -0.100 (0.287) |
| Dak Prescott | 0.237 (0.263) | -0.125 (0.285) | -0.025 (0.292) |
| White | 0.048 (0.218) | -0.207 (0.237) | -0.208 (0.242) |
| Dehumanization x Dak Prescott | -0.609** (0.353) | 0.397 (0.384) | -0.036 (0.393) |
| Dehumanization x White | -0.330 (0.294) | 0.460* (0.320) | 0.191 (0.328) |
| Dak Prescott x White | 0.009 (0.299) | -0.032 (0.325) | -0.123 (0.332) |
| Dehumanization x Dak Prescott x White | 0.245 (0.406) | -0.185 (0.441) | 0.264 (0.452) |
| Female | -0.408*** (0.091) | 0.382*** (0.099) | 0.434*** (0.102) |
| Age | -0.024*** (0.004) | 0.011*** (0.004) | 0.008** (0.004) |
| Education | -0.005 (0.035) | 0.020 (0.038) | -0.008 (0.039) |
| Republican | -0.319*** (0.025) | 0.328*** (0.027) | 0.381*** (0.027) |
| FT Rating - Kaepernick | 0.038*** (0.002) | -0.031*** (0.002) | -0.034*** (0.002) |
| Cowboys Fan | -0.356** (0.169) | 0.359** (0.184) | 0.299* (0.188) |
| Raiders Fan | 0.568** (0.317) | -0.748** (0.344) | -0.768** (0.352) |
| Constant | 4.269*** (0.315) | 3.397*** (0.342) | 3.932*** (0.350) |
| *N* | 1162 | 1162 | 1162 |
| *R*2 | 0.6002 | 0.4883 | 0.5262 |

Table entries are OLS coefficients with standard errors in parenthesis.

* p<0.1, ** p<0.05, *** p<0.01, one-tailed

**Table B11.** *Dehumanization and Attitudes towards Anthem Protests – Study 2 – Race Interaction*

|  | Protest Support | Punish Protest | Disrespect Military |
| --- | --- | --- | --- |
| **Dehumanization** | 0.611* (0.314) | -0.943*** (0.318) | -1.113*** (0.337) |
| **Black Player** | 0.321 (0.313) | -0.425 (0.317) | -0.710** (0.336) |
| White | 0.394 (0.258) | -0.375 (0.261) | -0.444 (0.277) |
| **Dehumanization x Black Player** | -0.435 (0.444) | 0.926** (0.450) | 1.523*** (0.477) |
| **Dehumanization x White** | -0.778** (0.358) | 0.823** (0.362) | 1.022*** (0.384) |
| Black Player x White | -0.415 (0.358) | 0.190 (0.362) | 0.582 (0.384) |
| Dehumanization x Black Player x White | 0.252 (0.506) | -0.320 (0.513) | -1.078** (0.543) |
| Female | 0.034 (0.109) | 0.072 (0.110) | 0.120 (0.116) |
| Age | -0.022*** (0.004) | 0.011** (0.004) | 0.013*** (0.005) |
| Education | 0.098** (0.045) | -0.117** (0.045) | -0.090* (0.048) |
| Republican | -0.699*** (0.026) | 0.579*** (0.026) | 0.688*** (0.028) |
| Constant | 6.339*** (0.366) | 2.163*** (0.371) | 2.050*** (0.393) |
| *N* | 986 | 986 | 986 |
| *R*2 | 0.4681 | 0.3678 | 0.4195 |

Table entries are OLS coefficients with standard errors in parenthesis.

* p<0.1, ** p<0.05, *** p<0.01, one-tailed

**Appendix C. Sample Characteristics**

**Table C1. Demographics**

| Demographic | Study 1 | Study 2 |
| --- | --- | --- |
| % Female | 37.2% | 47.3% |
| Age (mean) | 36.9 | 40.9 |
| Bachelor’s Degree or Higher | 56.5% | 58.4% |
| Democrats | 50.7% | 59.6% |
| Republicans | 37.7% | 31.1% |
| Independents | 11.6% | 9.4% |
| N | 876 | 759 |

Note: Demographics include white respondents only
